# Supplementary material for: Requirements for nucleocapsid-mediated regulation of reverse transcription during the late steps of HIV-1 assembly
Source: PubMed Central journal article supplement (PMC4895152; doi:10.1038/srep27536), 2016-06-07
Supplement: srep27536-s1.pdf [file srep27536-s1.pdf]

## Supplementary data

### Requirements for nucleocapsid-mediated regulation of reverse transcription during the late steps of HIV-1 assembly

Pierre-Jean Racine<sup>1+</sup>, Célia Chamontin<sup>1</sup>, Hugues de Rocquigny<sup>2</sup>, Serena Bernacchi<sup>3</sup>, Jean-Christophe Paillart<sup>3</sup> and Marylène Mougel<sup>1,\*</sup>

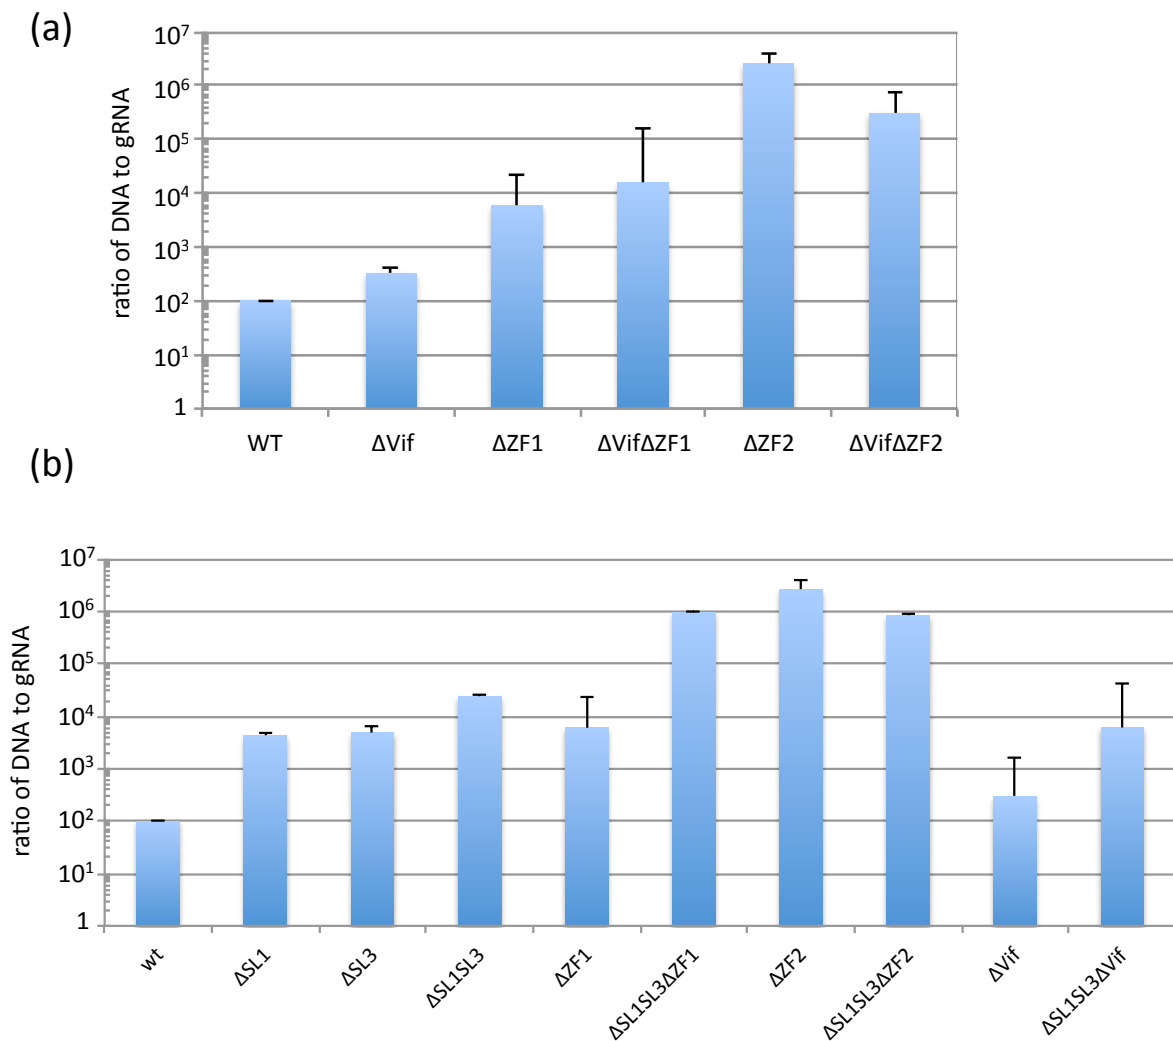

Figure S1: Quantitation of intravirion HIV-1 nucleic acids. Relative amounts of intravirion MS cDNAs and gRNA for the Vif (A) and Psi (B) mutant viruses. Intravirion levels of gRNA and MS DNAs were determined by RT-qPCR and qPCR, respectively (n=2). Number of copies of MS cDNAs and gRNA were determined in the same virus samples, normalized to WT amounts and ratios calculated as (% MS cDNA) / (% gRNA) x 100.
